# Supplementary material for: Factors associated with uptake of services to prevent mother-to-child transmission of HIV in a community cohort in rural Tanzania
Source: PubMed Central journal article supplement (PMC4680170; doi:10.1136/sextrans-2014-051907), 2015-06-04
Supplement: sextrans-2014-051907-s1.pdf [file sextrans-2014-051907-s1.pdf]

# Supplementary figure 1. Timeline of PMTCT guideline and services in Kisesa

| <u>PMTCT guidelines and regimen changes</u>                                                                                                               | <u>Year</u> | <u>Implementation of services in Kisesa</u>                                                                  |
|-----------------------------------------------------------------------------------------------------------------------------------------------------------|-------------|--------------------------------------------------------------------------------------------------------------|
| ART if CD4<200<br>Single-dose nevirapine during labour and to infant within 72 hours                                                                      | 2005        | VCT clinic opens in Kisesa health centre (HIV-positive pregnant women are referred to Mwanza city hospitals) |
|                                                                                                                                                           | 2006        |                                                                                                              |
| AZT from 28 weeks gestation until 7 days postpartum*, infants receive nevirapine for 1 week/ AZT for up to 4 weeks                                        | 2007        |                                                                                                              |
|                                                                                                                                                           | 2008        |                                                                                                              |
|                                                                                                                                                           | 2009        | CTC opens in Kisesa health centre<br>PMTCT services start in Kisesa health centre and dispensaries           |
|                                                                                                                                                           | 2010        |                                                                                                              |
|                                                                                                                                                           | 2011        |                                                                                                              |
| ART if CD4<350<br>Option 'A': AZT from 14 weeks gestation until 7 days postpartum*, infants receive nevirapine until 1 week after breastfeeding cessation | 2012        |                                                                                                              |

\*single-dose nevirapine + azidothymidine(AZT) + lamivudine during labour; AZT+lamivudine postpartum
