# Supplementary material for: Factors associated with uptake of services to prevent mother-to-child transmission of HIV in a community cohort in rural Tanzania
Source: PubMed Central journal article supplement (PMC4680170; doi:10.1136/sextrans-2014-051907), 2015-06-04

# Flow chart of number of participants and pregnancies included in the analysis and flow through the PMTCT cascade

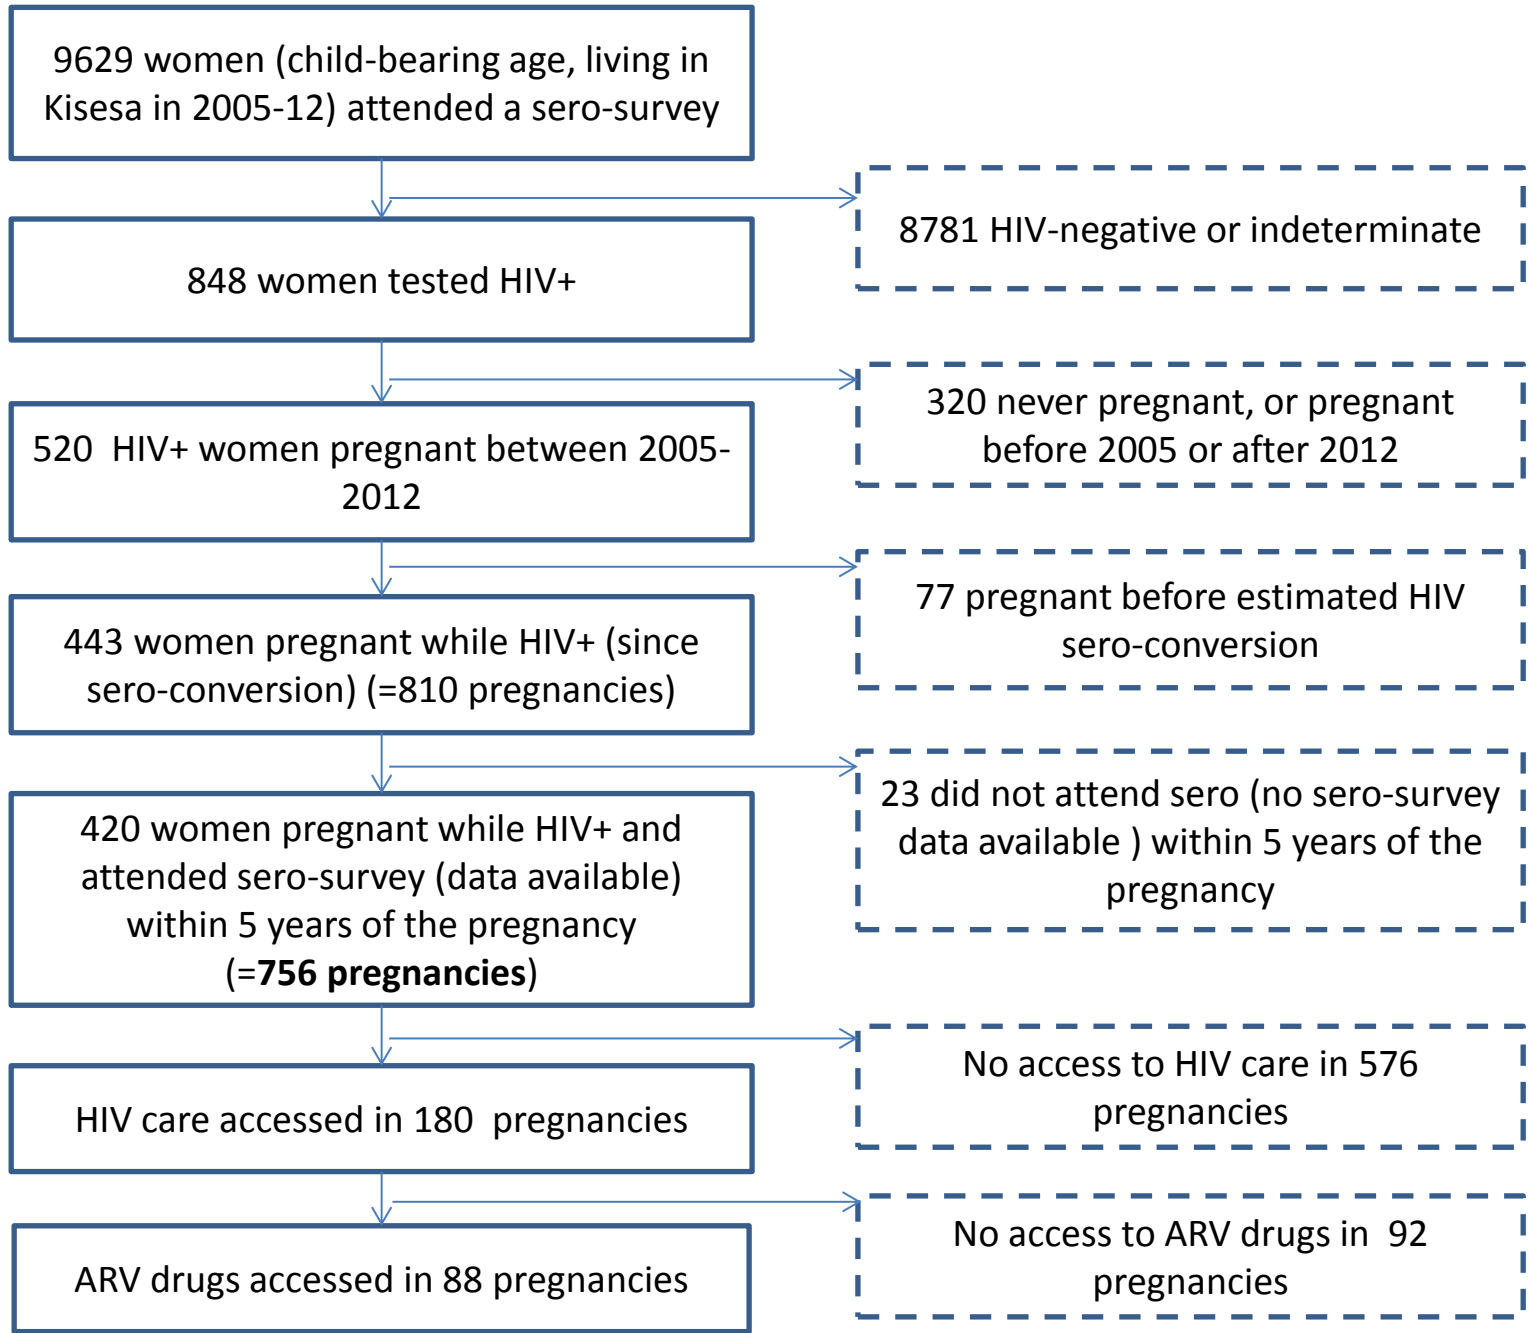

Supplement: sextrans-2014-051907-s2.pdf [file sextrans-2014-051907-s2.pdf]
